# Supplementary material for: Identification of novel target sites and an inhibitor of the dengue virus E protein
Source: Springer Nature journal article supplement (doi:10.1007/s10822-009-9263-6), 2009-02-24
Supplement: MOESM1 [file 10822_2009_9263_MOESM1_ESM.doc]

**Supplementary Table 1 Compound databases used for virtual screening**

| Database name | Number of compounds:  unfiltered | Number of compounds: filtered |
| --- | --- | --- |
| Agro | 80 | 23 |
| Chemdivision 1 | 100 000 | 30 041 |
| Chemdivision 2 | 100 000 | 48 659 |
| Genplus | 960 | 103 |
| Killer A | 80 | 21 |
| Killer B | 80 | 36 |
| Maybridge | 60 000 | 14 365 |
| Natprod | 720 | 145 |
| NATx | 5 052 | 1 270 |
| NCI | 250 251 | 9 817 |
| Spectrum | 2 000 | 571 |
| Timtec | 121 824 | 8 537 |
| Cancer | 80 | 21 |
| ***Total*** | 641 127 | 113 609 |

**Supplementary Table 2** DOCK v 5.1.1 ligand parameters.

| ligand_atom_file | ligand_concord.mol2 |
| --- | --- |
| ligand_outfile_prefix | ligand_out |
| write_orientations | yes |
| write_conformations | yes |
| calculate_rmsd | yes |
| rank_ligands | no |
| max_send_queue_size | 10 |
| max_recv_queue_size | 10 000 |
| orient_ligand | yes |
| automated_matching | yes |
| receptor_site_file | pro.sph |
| max_orientations | 1000 |
| flexible_ligand | yes |
| min_anchor_size | 10 |
| number_confs_per_cycle | 50 |
| use_clash_overlap | no |
| anchor_rmsd_clustering | no |
| bump_filter | yes |
| bump_grid_prefix | pro |
| max_bumps | 3 |
| score_molecules | yes |
| contact_score_primary | no |
| contact_score_secondary | no |
| energy_score_primary | yes |
| energy_score_secondary | yes |
| vdw_scale | 1 |
| es_scale | 1 |
| nrg_grid_prefix | pro |
| minimize_ligand | yes |
| minimze_rigid_anchor | yes |
| minimze_layer_growth | yes |
| minimze_final_pose | yes |
| minimze_final_pose_rigid | no |
| minimze_final_pose_torsions | no |
| minimize_final_pose_complete | yes |
| minimizer_choice | 0 |
| initial_translation | 1 |
| initial_rotation | 1 |
| initial_torsion | 10 |
| use_rotational_minimizer | no |
| maximum_iterations | 100 |
| maximum_function_calls | 100 000 |
| window_based_termination | no |
| scaled_range_termination | no |
| multiple_simplex_cycles | no |
| random_number_generator | 0 |
| random_number_seed | 2002 |
| calc_internal_energy | no |
| atom_model | all |
| vdw_defn_file | vdw.defn |
| flex_defn_file | flex.defn |
| flex_drive_file | flex_drive.tbl |

**Supplementary Table 3** DOCK v 5.1.1 protein parameters

| compute_grids | yes |
| --- | --- |
| grid_spacing | 0.3 |
| output_molecule | no |
| contact_score | yes |
| contact_cutoff_distance | 4.5 |
| chemical_score | yes |
| energy_score | yes |
| energy_cutoff_distance | 5 |
| atom_model | u |
| attractive_exponent | 6 |
| repulsive_exponent | 12 |
| distance_dielectric | yes |
| dielectric_factor | 4 |
| bump_filter | yes |
| bump_overlap | 0.5 |
| receptor_file | pro_syb.mol2 |
| box_file | box.pdb |
| vdw_definition_file | vdw.defn |
| chemical_definition_file | chem.defn |
| score_grid_prefix | pro |

**Supplementary Table 4 GOLD docking parameters**

| Parameters | Library screening settings | 3-times-up settings | Standard settings |
| --- | --- | --- | --- |
| Population size | 50 | 100 | 100 |
| Number of islands | 1 | 3 | 5 |
| Niche size | 2 | 2 | 2 |
| Selection pressure | 1.125 | 1.100 | 1.100 |
| Migrate | 0 | 10 | 2 |
| Number of operators | 1 000 | 30 000 | 100 000 |
| Mutate | 100 | 95 | 95 |
| Crossover | 100 | 95 | 95 |

**Supplementary Table 5** Structures, database source and virtual screening results for the 41 compounds with GOLD fitness score >70. Compounds R1-R7 are indicated.

| Chemical Structure | Database | GOLD fitness score | GOLD X-Score (kcal/mol) | FlexX binding energy (kcal/mol) | FlexX X-Score (kcal/mol) | DOCK binding energy (kcal/mol) | DOCK X-Score (kcal/mol) |
| --- | --- | --- | --- | --- | --- | --- | --- |
| 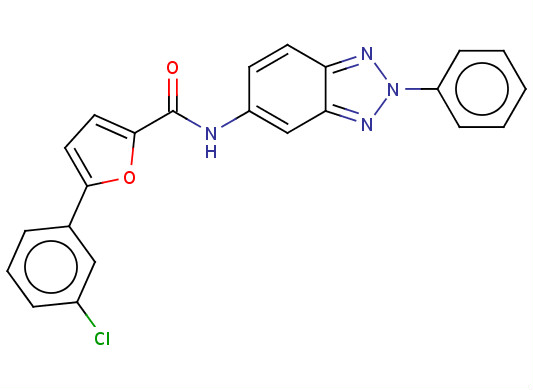R1 | Chemdivison 2 | 71.72 | -9.43 | -18.06 | -7.52 | -5.83 | -7.31 |
| 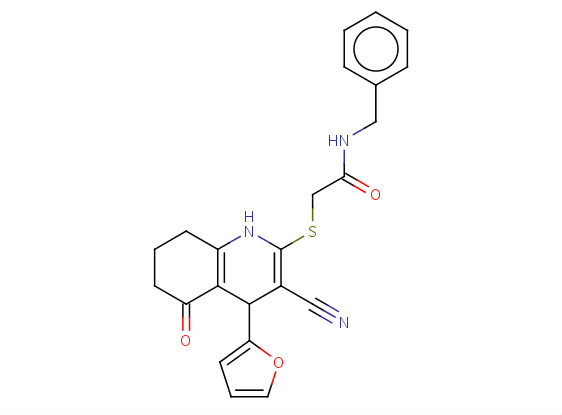R2 | Chemdivison 2 | 71.75 | -8.42 | -19.82 | -7.38 | -9.44 | -6.64 |
| 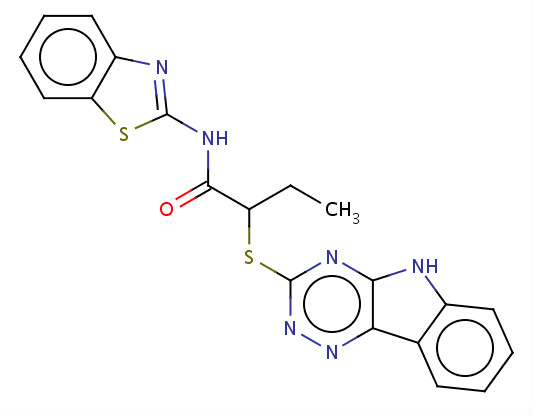R3 | Chemdivison 2 | 77.42 | -9.21 | -15.93 | -7.04 | -8.39 | -7.03 |
| 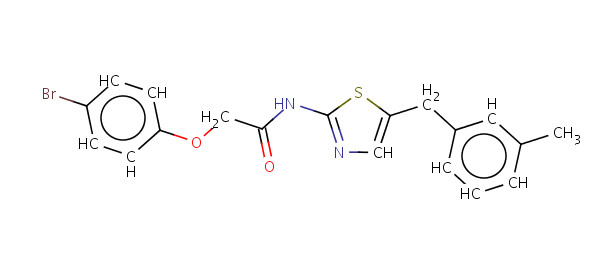R4 | Chemdivison 2 | 70.11 | -8.79 | -13.91 | -7.44 | -11.58 | -7.92 |
| 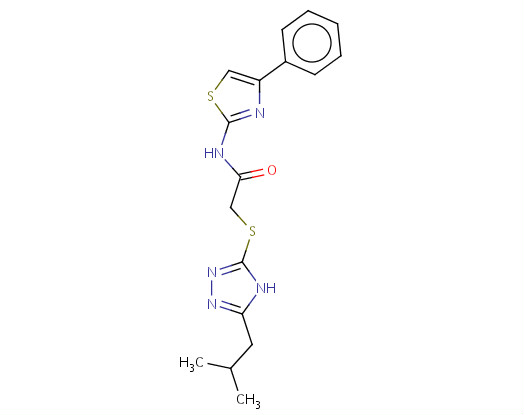R5 | Chemdivison 2 | 71.93 | -8.66 | -14.35 | -6.61 | -10.74 | -6.63 |
| 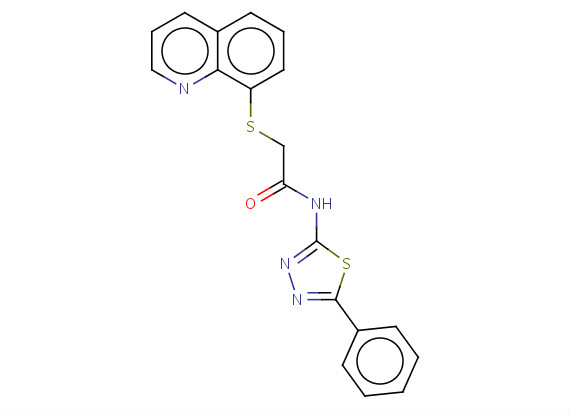R6 | Chemdivison 2 | 72.29 | -8.68 | -17.06 | -7.13 | -11.03 | -6.94 |
| 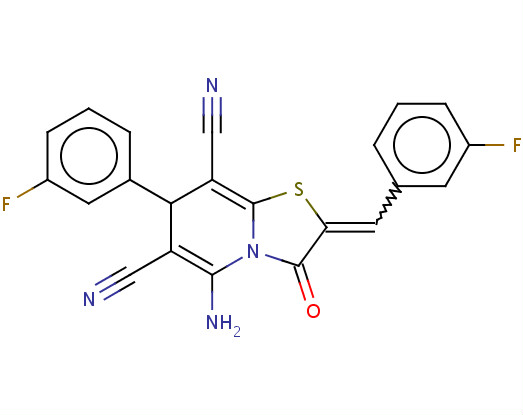R7 | Timtec | 70.13 | -9.11 | -13.88 | -7.06 | -4.77 | -7.19 |
| 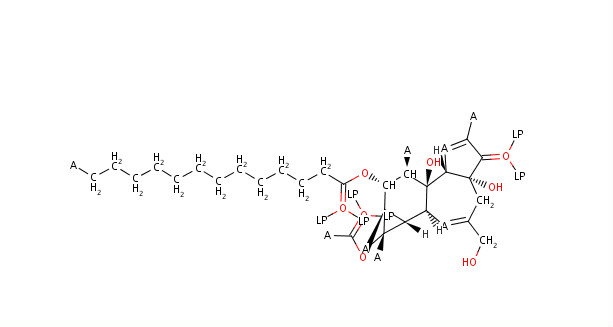 | Killer A | 70.72 | -7.99 | 1.69 | -6.84 | -13.89 | -7.73 |
| 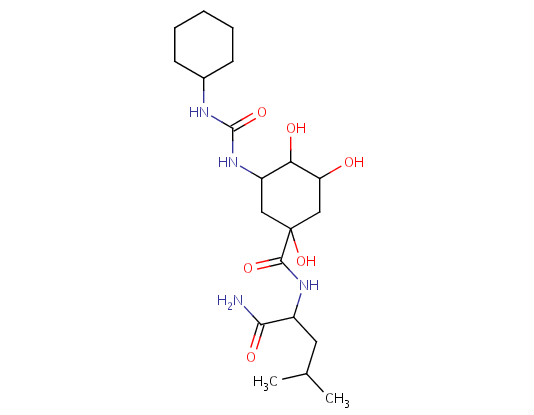 | NATx | 70.29 | -8.64 | -21.95 | -8.72 | -7.92 | -6.82 |
| 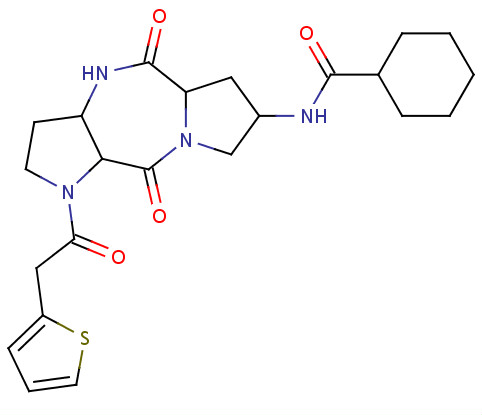 | NATx | 70.39 | -8.67 | -12.86 | -7.70 | -5.61 | 6.80 |
| 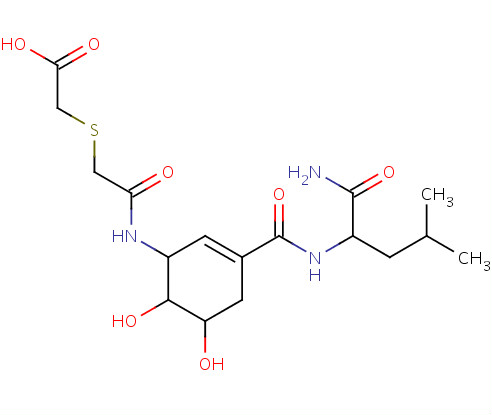 | NATx | 70.39 | -7.23 | 19.58 | -6.99 | -11.83 | -6.57 |
| 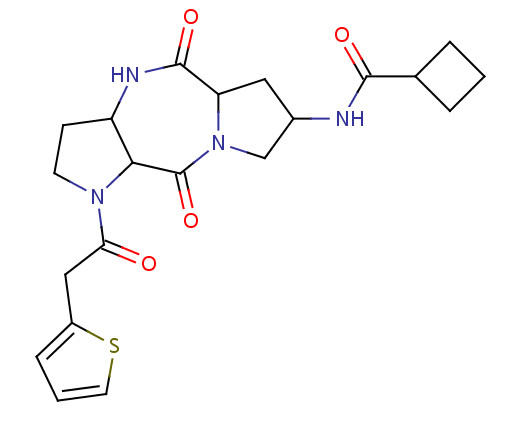 | NATx | 70.52 | -8.74 | -14.44 | -7.32 | -8.44 | -6.76 |
| 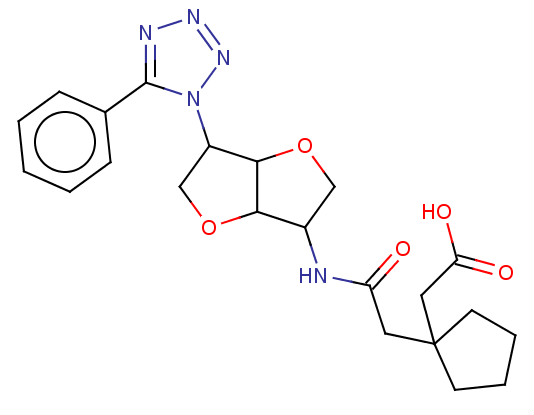 | NATx | 70.94 | -8.48 | -23.12 | -8.85 | -8.31 | -6.37 |
| 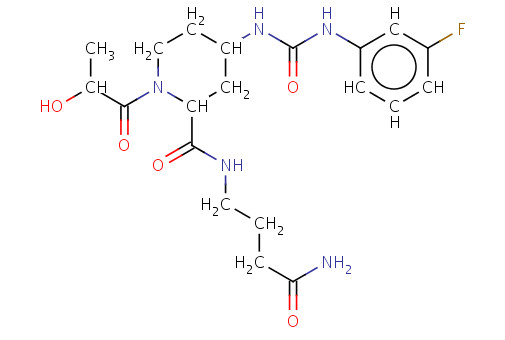 | NATx | 71.41 | -6.85 | -23.05 | -7.67 | -8.40 | -6.39 |
| 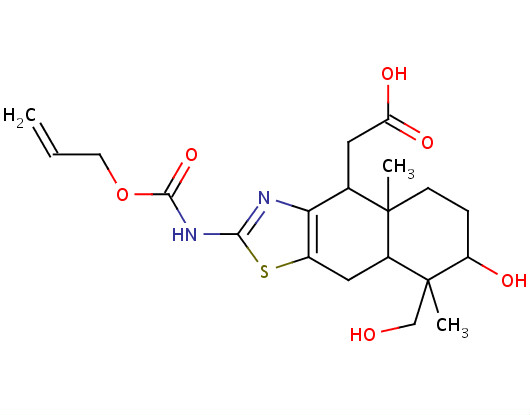 | NATx | 71.45 | -7.70 | -16.32 | -8.56 | -8.98 | -7.81 |
| 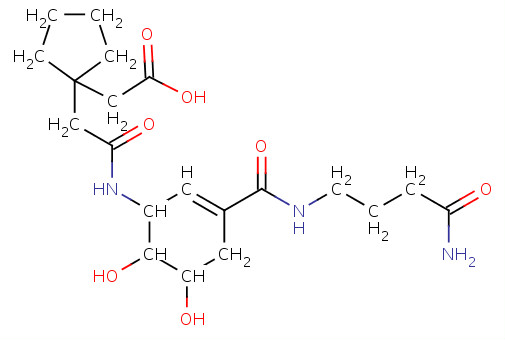 | NATx | 71.59 | -7.58 | -18.19 | -7.63 | -11.82 | -8.09 |
| 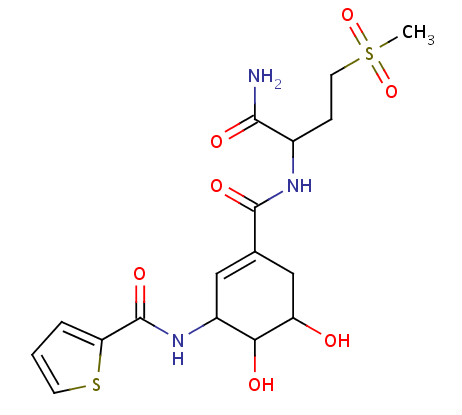 | NATx | 71.73 | -7.57 | -21.46 | -6.95 | -10.09 | -6.84 |
| 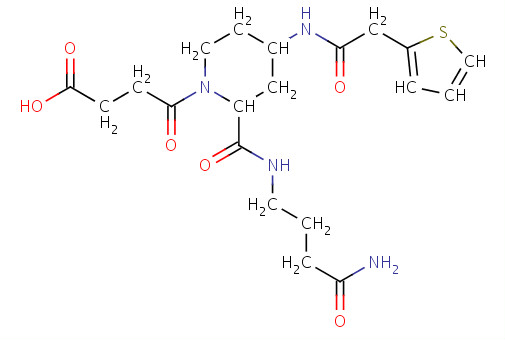 | NATx | 72.47 | -6.96 | -18.86 | -6.52 | -9.17 | -6.43 |
| 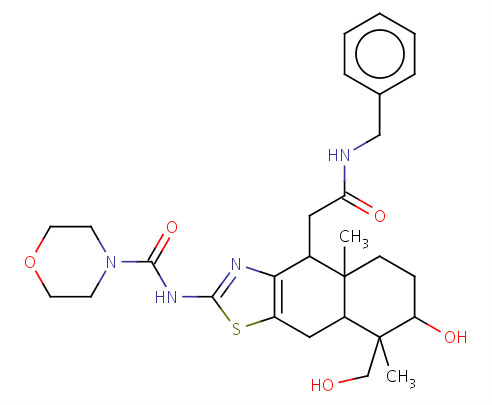 | NATx | 72.73 | -8.04 | -15.86 | -8.75 | -13.00 | -8.12 |
| 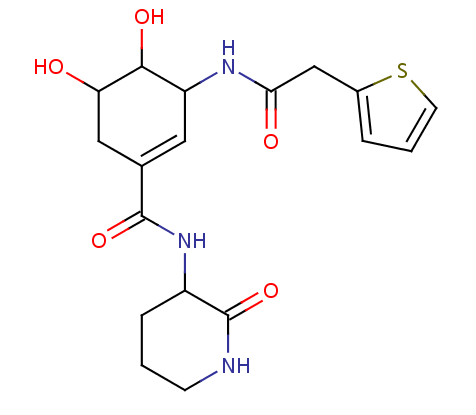 | NATx | 74.75 | -7.80 | -19.20 | -7.00 | -11.62 | -7.25 |
| 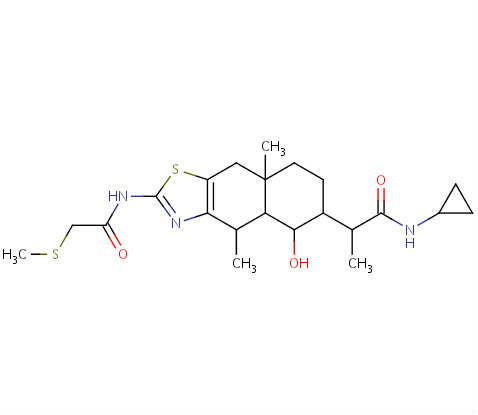 | NATx | 75.76 | -7.93 | -13.45 | -7.43 | -9.56 | -8.23 |
| 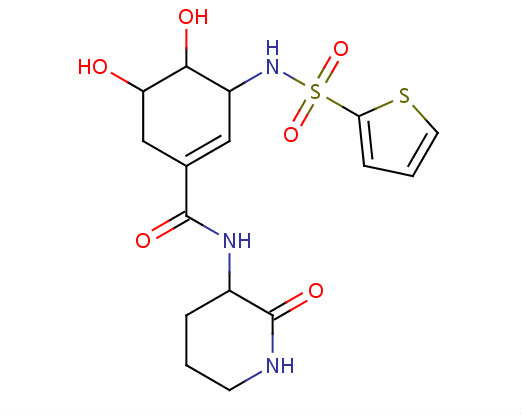 | NATx | 75.91 | -7.68 | -18.75 | -6.99 | -8.6 | -7.19 |
| 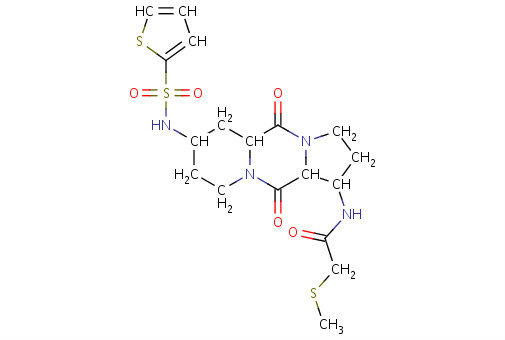 | NATx | 77.01 | -7.78 | -9.41 | -7.41 | -0.34 | -7.50 |
| 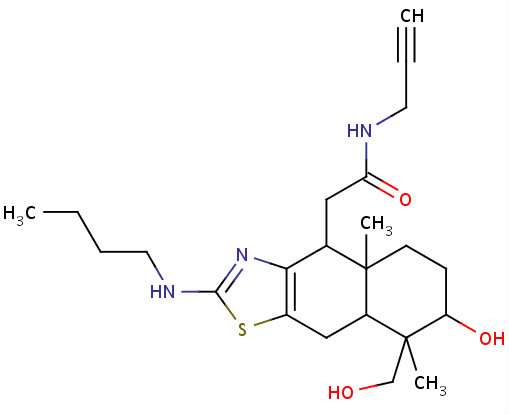 | NATx | 77.76 | -7.63 | -12.29 | -8.40 | -7.41 | -7.62 |
| 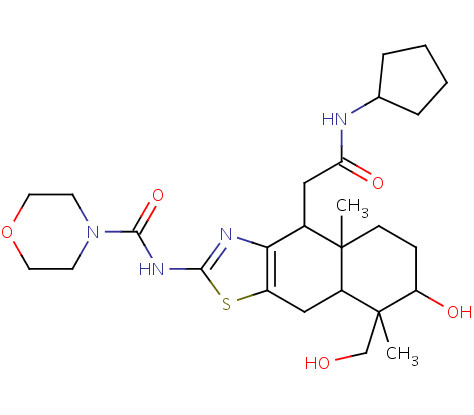 | NATx | 78.32 | -8.57 | -15.48 | -8.92 | -8.056 | -6.96 |
| 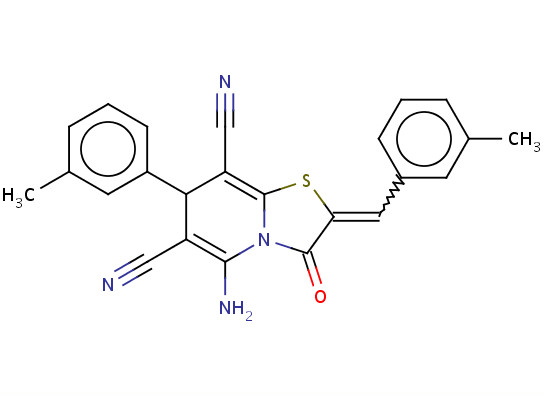 | Timtec | 73.80 | -9.47 | -14.22 | -7.50 | 20.14 | -8.55 |
| 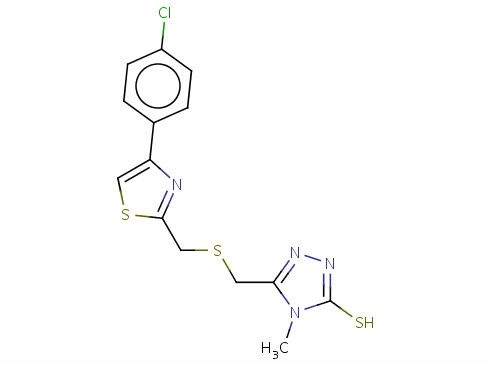 | Maybridge | 70.20 | -8.54 | -16.84 | -6.68 | -9.19 | -6.99 |
| 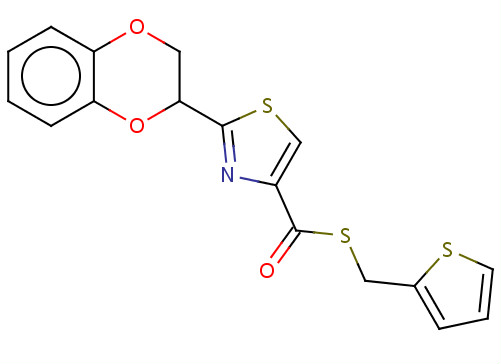 | Maybridge | 71.34 | -8.12 | -15.98 | -7.24 | -10.33 | -6.87 |
| 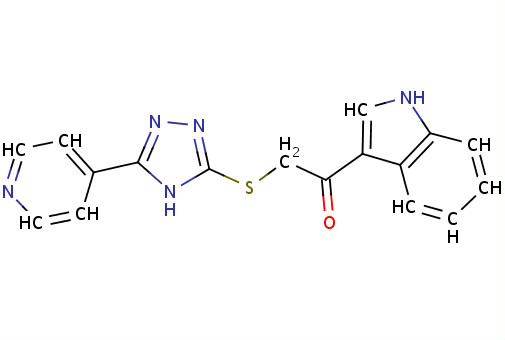 | Chemdivison 2 | 70.21 | -8.47 | -17.17 | -7.10 | -8.98 | -6.68 |
| 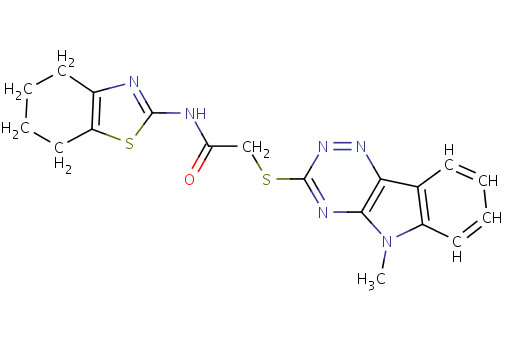 | Chemdivison 2 | 70.47 | -8.71 | -14.03 | -6.72 | -9.09 | -7.16 |
| 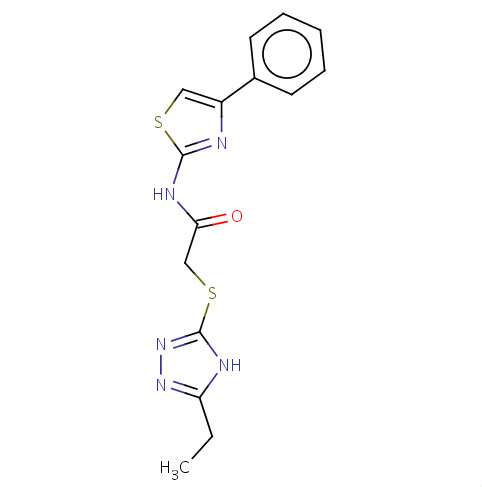 | Chemdivison 2 | 70.68 | -8.57 | -14.60 | -6.44 | -10.83 | -7.13 |
| 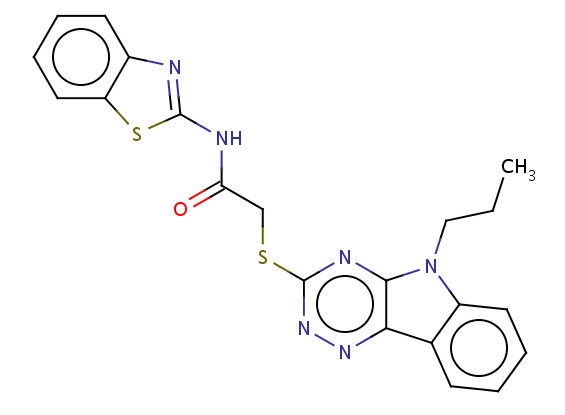 | Chemdivison 2 | 71.05 | -8.51 | -12.64 | -6.71 | -12.07 | -7.64 |
| 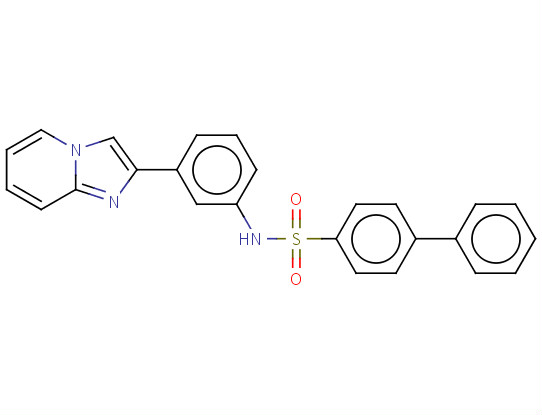 | Chemdivison 2 | 71.11 | -9.48 | -16.18 | -8.05 | -8.99 | -7.41 |
| 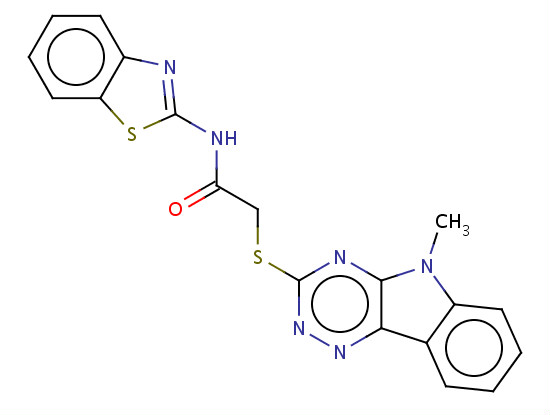 | Chemdivison 2 | 71.28 | -8.60 | -13.84 | -6.69 | -9.41 | -6.79 |
| 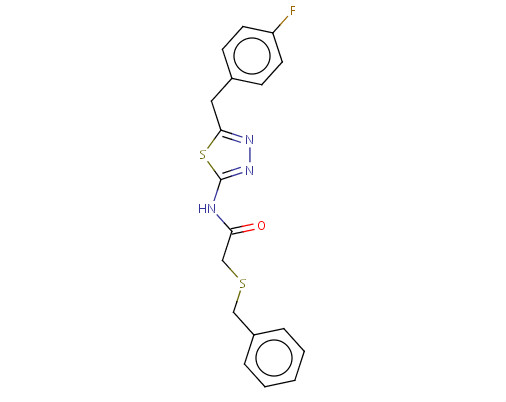 | Chemdivison 2 | 71.42 | -8.67 | -13.08 | -6.90 | -11.00 | -7.29 |
| 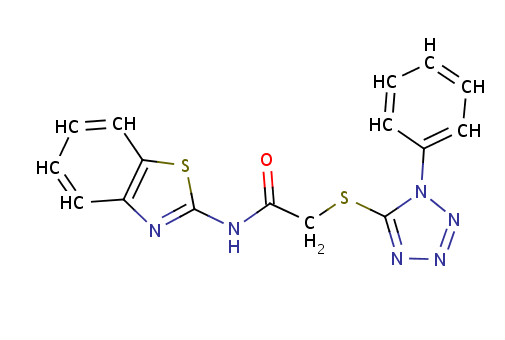 | Chemdivison 2 | 71.73 | -8.70 | -16.23 | -6.53 | -9.95 | -7.16 |
| 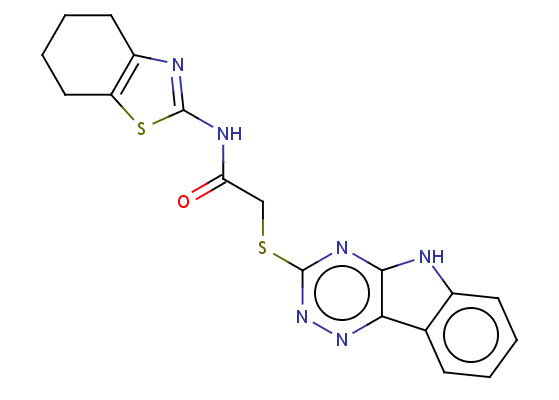 | Chemdivison 2 | 72.00 | -8.56 | -14.56 | -6.86 | -8.44 | -6.98 |
| 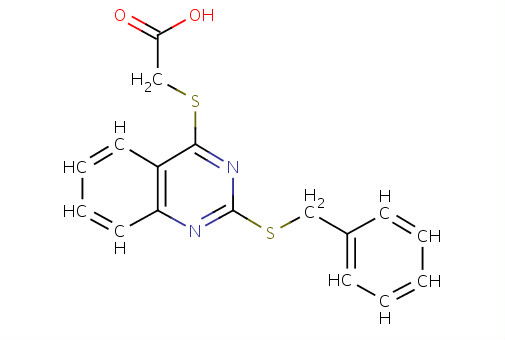 | Chemdivison 2 | 72.25 | -8.65 | -14.10 | -6.93 | -10.33 | -6.64 |
| 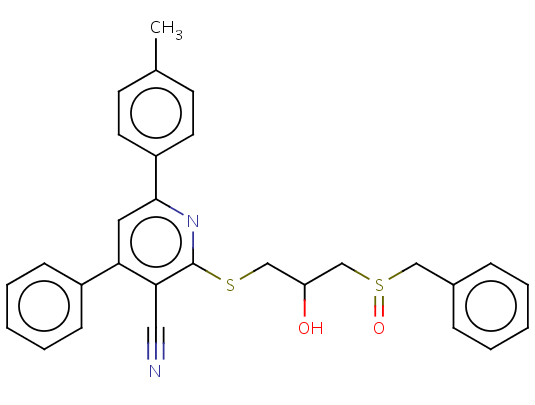 | Chemdivison 2 | 72.35 | -8.99 | -5.76 | -7.29 | 1548.84 | -7.48 |
| 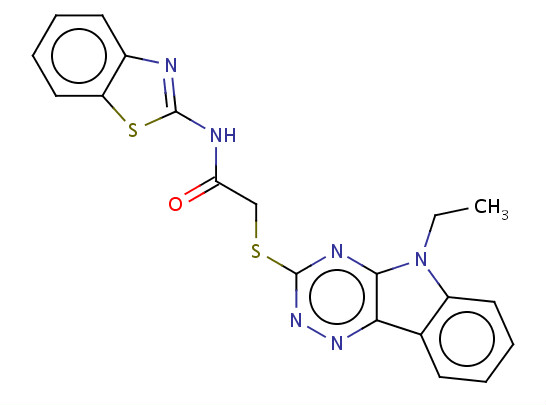 | Chemdivison 2 | 73.32 | -8.83 | -13.88 | -6.69 | -10.02 | -7.39 |
| 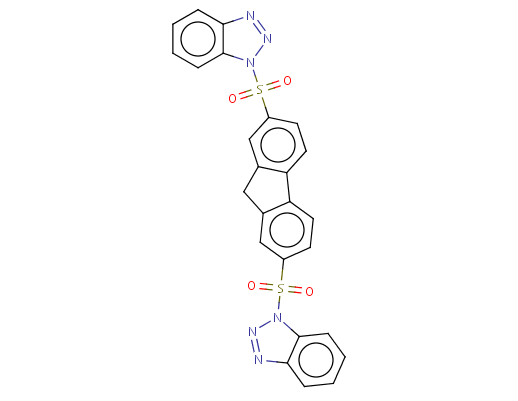 | Chemdivison 2 | 75.33 | -9.38 | -12.23 | -8.16 | -4.95 | -7.32 |

**Supplementary Table 6 Physicochemical properties of compounds R1-R7**

| ***Molecule*** | ***Molecular mass (Da)*** | ***Number of H-bond donors*** | ***Number of H-bond acceptors*** | ***Rotatable bond count*** | ***ClogP*** a | ***ClogD*** a |
| --- | --- | --- | --- | --- | --- | --- |
| R1 | 414.8 | 1 | 5 | 5 | 5.82 | 5.88 |
| R2 | 419.5 | 2 | 5 | 8 | 2.31 | 2.39 |
| R3 | 420.5 | 2 | 7 | 6 | 5.23 | 0.86 |
| R4 | 417.3 | 1 | 5 | 7 | 4.86 | 4.20 |
| R5 | 373.5 | 2 | 6 | 8 | 3.69 | 3.91 |
| R6 | 378.5 | 1 | 6 | 6 | 4.06 | 4.54 |
| R7 | 418.4 | 3 | 8 | 4 | 4.21 | 3.83 |

a ClogP is the calculated value of the logarithm of the octanol/water partition coefficient, and ClogD is the calculated value of the logarithm of the octanol/water distribution coefficient. Calculated with the program MarvinView (ChemAxon).

**Supplementary Table 7** Interactions of compounds R1-R7 with DENV2 E protein after docking with GOLD

| ***Molecule*** | Residues forming hydrogen-bonds (number of bonds) | ***Number of other interacting residues*** | ***Close contacts (2.5-3.5 Å)*** | ***Percentage of close contacts*** | ***GOLD fitness score*** | ***Xscore (kcal/mol)*** |
| --- | --- | --- | --- | --- | --- | --- |
| R1 | Ser363 (1), Thr359 (1), Ser 145 (1) | 14 | 13 of 33 | 39.4 | 71.72 | -9.43 |
| R2 | Ser363 (2), Ile357 (1), Ser145 (1) | 13 | 8 of 34 | 33 | 71.75 | -8.42 |
| R3 | Tyr178 (1), Ser145 (1) | 13 | 10 of 36 | 27.7 | 77.42 | -9.21 |
| R4 | Tyr178 (1) | 10 | 13 of 35 | 37 | 70.11 | -8.79 |
| R5 | Ser363 (1), Ile357 (1), Glu147 (1), Ser 145(2) | 15 | 5 of 27 | 18.5 | 71.93 | -8.66 |
| R6 | Ser363 (1), Ile357 (1), Asn355 (1), Ser145 (3) | 11 | 10 of 36 | 27.7 | 72.29 | -8.68 |
| R7 | Ile357 (2), Ser363 (1), Ser145 (1) | 10 | 10 of 42 | 23.8 | 70.13 | -9.11 |

**Supplementary Table 8** Interactions of compounds R1-R7 with envelope proteins of other flaviviruses after docking with GOLD

| ***Protein (PDB ID)*** | ***Residues forming hydrogen-bonds*** | ***Number of other interacting residues*** | ***Close contacts (2.5–3.5 Å)*** | ***Percentage of close contacts*** | ***GOLD fitness score*** | ***X-Score (kcal/mol)*** |
| --- | --- | --- | --- | --- | --- | --- |
| 1OKE | Ser363, Thr359, Ser145 | 14 | 13 of 33 | 39.4 | 71.72 | -9.43 |
| 1OAN | Ser363, Glu360, Thr359 | 12 | 9 of 27 | 33.3 | 67.68 | -9.51 |
| 1UZG | Thr357, Val355, Thr145 | 11 | 11 of 35 | 31.43 | 52.53 | -8.49 |
| 1SVB | Tyr179, Glu178 | 8 | 8 of 22 | 36.4 | 60.28 | -9.04 |
| 2HG0 | - | 7 | 11 of 34 | 32.3 | 55.81 | -8.74 |
| JEV a | Ser364, Phe360, Tyr155, Thr146, Gly145 | 11 | 13 of 44 | 29.5 | 53.13 | -9.09 |

a Japanese encephalitis E protein structure (Kolaskar and Kulkarni-Kale (1999) Virology 261:31).

**Supplementary Fig. 1**


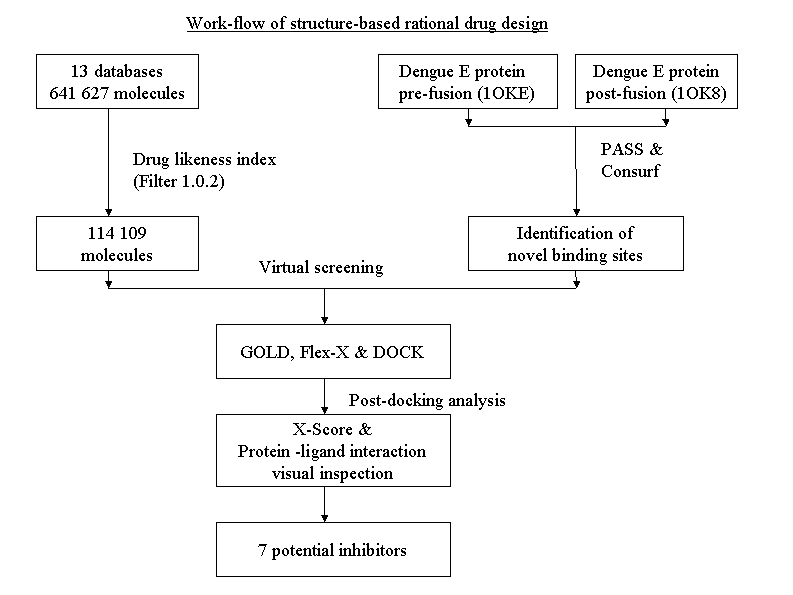


Supplementary Fig. 1. Work-flow diagram of the virtual screening procedure used in this work.
